# Supplementary material for: Standardized Herbal Formula PM014 Inhibits Radiation-Induced Pulmonary Inflammation in Mice
Source: PubMed Central journal article supplement (PMC5359558; doi:10.1038/srep45001), 2017-03-21
Supplement: srep45001-s1.pdf [file srep45001-s1.pdf]

## Supplementary Information

**Title : Standardized Herbal Formula PM014 Inhibits Radiation-Induced Pulmonary Inflammation in Mice**

**Jee-Youn Kim<sup>1,†</sup>, Dasom Shin<sup>2,†</sup>, Gihyun Lee<sup>2</sup>, Jin-Mo Kim<sup>1</sup>, Dongwook Kim<sup>2</sup>, Yong-Min An<sup>1</sup>, Byung Rok Yoo<sup>1</sup>, Hanna Chang<sup>1</sup>, Miran Kim<sup>3</sup>,**

**Jaeho Cho<sup>1,\*</sup> & Hyunsu Bae<sup>2,\*</sup>**

**Supplementary Table S1. Composition and amount of PM014**

| <b>Formula of PM014</b>                       | <b>Amount (g)</b> | <b>Chemical marker</b> |
|-----------------------------------------------|-------------------|------------------------|
| Root of <i>Rehmannia glutinosa</i> (RG)       | 600               | 5-HMF                  |
| Cortex of <i>Paeonia suffruticosa</i> (PS)    | 300               | Paeoniflorin           |
| Fruit of <i>Schizandra chinensis</i> (SC)     | 300               | Schizandrin            |
| Root of <i>Asparagus cochinchinensis</i> (AC) | 300               | Asparagine             |
| Seed of <i>Prunus armeniaca</i> (PA)          | 225               | Amygdalin              |
| Root of <i>Scutellaria baicalensis</i> (SB)   | 225               | Baicalin               |
| Root of <i>Stemona sessilifolia</i> (SS)      | 150               | Stemonine              |
| Total                                         | 2,100 g           |                        |

## Supplementary Table S2

### The parameter description using the flexiVent™ system measurements

| Parameter                | Abbreviations | Description                                                                                                                                                             |
|--------------------------|---------------|-------------------------------------------------------------------------------------------------------------------------------------------------------------------------|
| Inspiratory Capacity     | IC            | IC is the volume difference between functional residual capacity (FRC) and total lung capacity (TLC),<br>Also equaling tidal volume plus the inspiratory reserve volume |
| Quasi-static Compliance  | Cst           | The parameter K of the Salazar-Knowles equation reflects the curvature of the upper portion                                                                             |
| Tissue Damping           | G             | Tissue damping is closely related to tissue resistance and reflects the energy dissipation in the lung tissues.                                                         |
| Tissue Elastance         | H             | The parameter H is closely related to tissue elastance and reflects the energy conservation in the lung tissues.                                                        |
| Newtonian Resistance     | Rn            | The Newtonian Resistance parameter of the Constant Phase Model represents the resistance of the central<br>airway.                                                      |
| Airway constriction      | Rrs           | Resistance of the respiratory system                                                                                                                                    |
| Forced Expiration Volume | FEV           | Amount of air forcefully exhaled (drawn) at different time points                                                                                                       |
| Forced Vital Capacity    | FVC           | Amount of air the animal can physically exhale                                                                                                                          |

Supplementary Figure S1

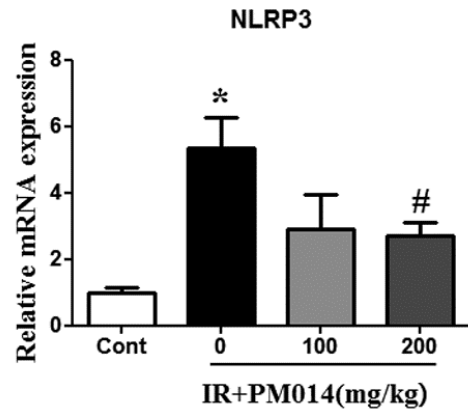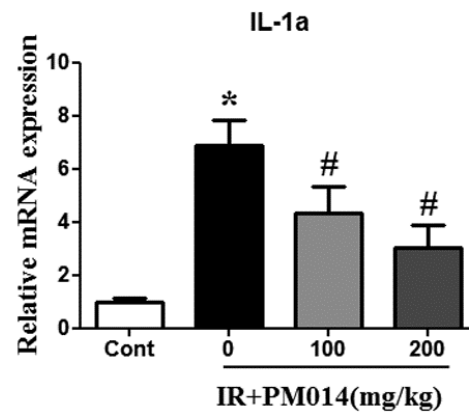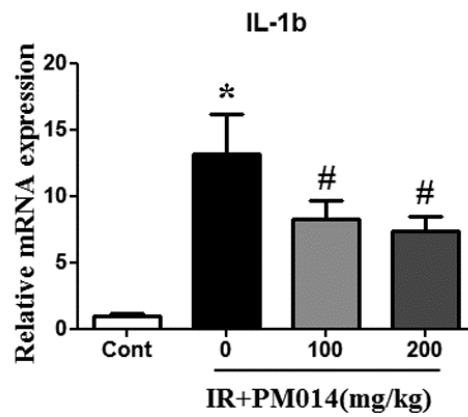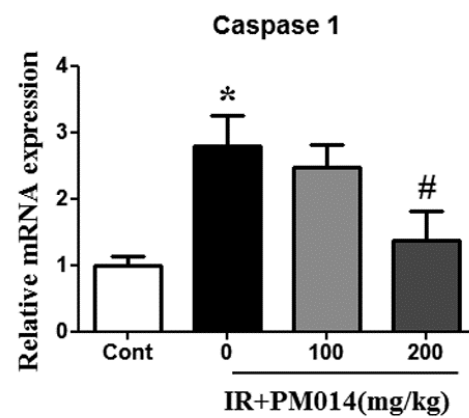

## Supplementary Figure S2

**A**

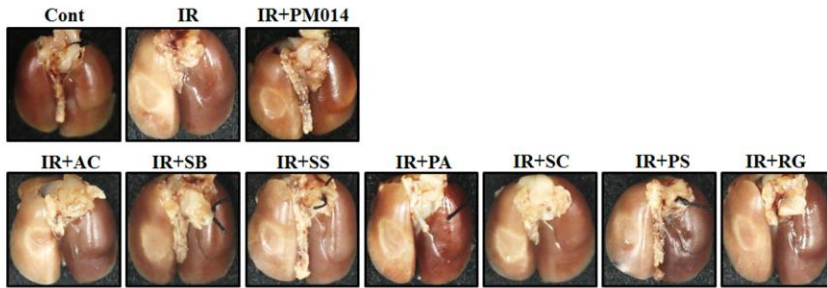

**B**

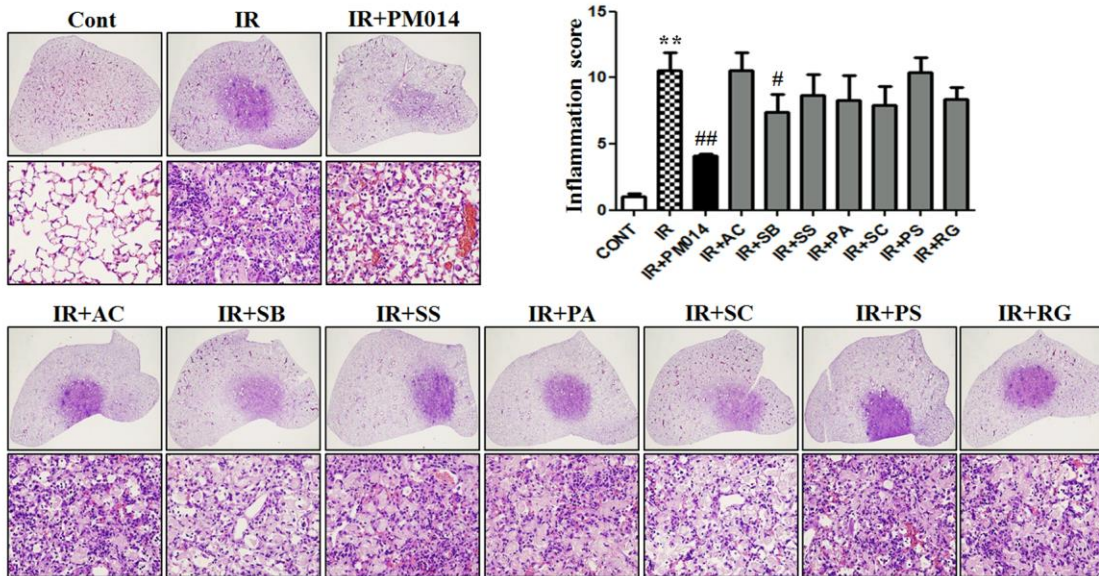

C

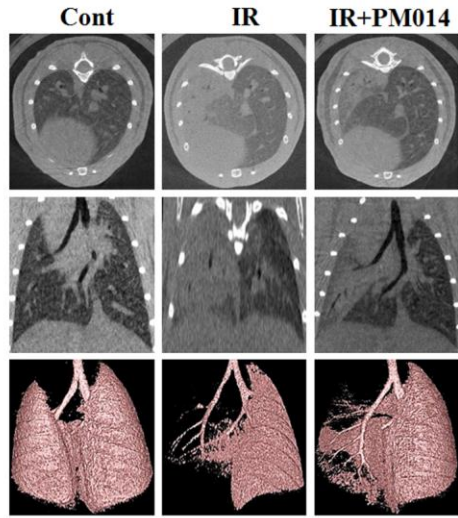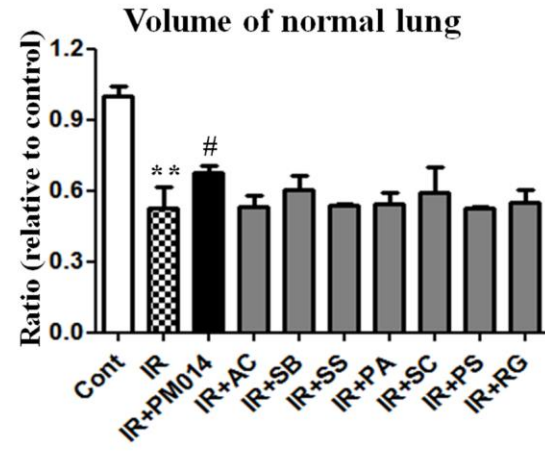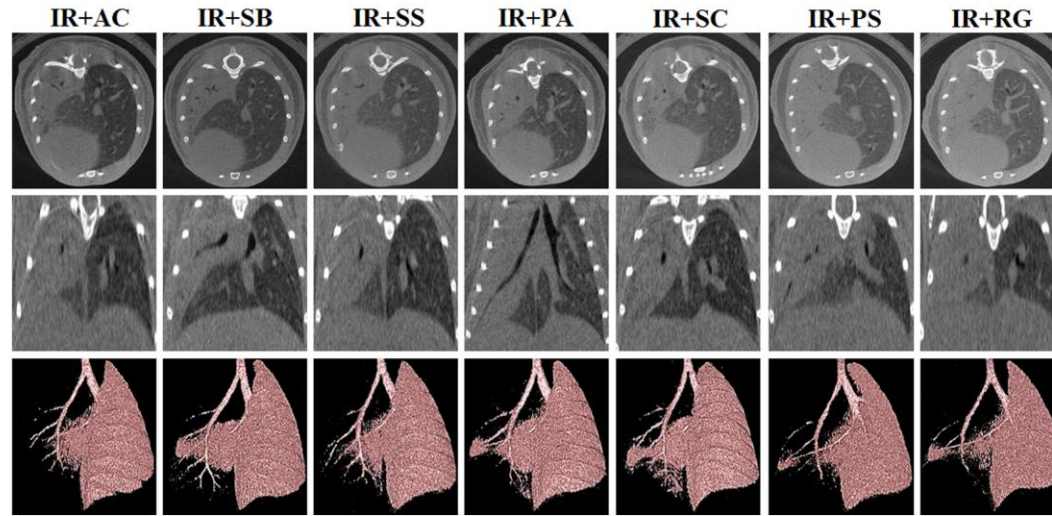

### **Supplementary Figure S1. Effect of PM014 on mRNA of inflammasome-related genes after 75Gy irradiation.**

Quantitative real-time polymerase chain reaction (RT-PCR) analysis showed that PM014 treatment decreased mRNA expression of inflammasome-related genes in the mouse lungs. cDNA was synthesized from the total RNAs extracted from irradiated mouse and subjected to RT-PCR analysis. Control, untreated; 0, irradiation (IR); 100, irradiation + 100 mg/kg PM014; and 200, irradiation + 200 mg/kg PM014. Data are expressed as mean number of cells  $\pm$  standard error (\*P < 0.05 versus control; #P < 0.05 versus IR). The sequences of the mouse primers were as follows: *Nlrp3* (FW 5'-atgctgcttcgacatctcct-3'; RW 5'-gtttctggaggtgcagagc-3'), *Il1a* (FW 5'-ccgacctcattttcttctgg-3'; RW 5'-gtgcaccgactttgttctt-3'), *Il1b* (FW 5'-gccccatctctgtgactcat-3'; RW 5'-aggccacaggtattttgtcg-3'), *Casp1* (FW 5'-cacagctctggagatggtga-3'; RW 5'-ggccccacatattcctcct-3').

### **Supplementary Figure S2. Effect of individual herbs in PM014 on gross morphology, histological and micro-CT analysis at 2 weeks after 75 Gy irradiation**

Mice were exposed to a single dose of 75 Gy delivered to the left lung in a single fraction and orally administered PM014 (200 mg/kg) or each herb extract (in proportion to PM014) on days 3, 5, 7, 9, 10, and 13, and then sacrificed at 2 weeks after irradiation. (A) Lungs were photographed after complete fixation. (B) Haematoxylin and eosin-stained lung sections and quantification of inflammatory foci. (C) micro-CT findings. Horizontal (top), trans-axial (middle), and 3D micro-CT (bottom) images and quantification of volume of normal lung. Control, untreated; IR, irradiation; AC, Root of *Asparagus cochinchinensis*; SB, Root of *Scutellaria baicalensis*; SS, Root of *Stemona sessilifolia*; PA, Seed of *Prunus armeniaca*; SC, Fruit of *Schizandra chinensis*; PS, Cortex of *Paeonia suffruticosa*; RG, Root of *Rehmannia glutinosa*. (\*\*P < 0.01 versus control; #P < 0.05 and ##P < 0.01 versus IR).
